# Supplementary material for: Identification and Functional Prediction of Long Non-Coding RNAs in Dilated Cardiomyopathy by Bioinformatics Analysis
Source: Front Genet. 2021 Apr 16;12:648111. doi: 10.3389/fgene.2021.648111 (PMC8085533; doi:10.3389/fgene.2021.648111)
Supplement: Supplementary file 9 [file Table_6.XLSX]

## Sheet: Sheet1
Supplementary Table S6 Result of subcellular locolization prediction
Ensembl gene ID	Gene symbol	Ensembl transcript ID	DeepLncRNA		lncLocator		iLoc-lncRNA
			Predicted location	Probability score	Predicted location	Probability score	Predicted location	Probability score
ENSG00000267470	ZNF571-AS1	ENST00000590838	nucleus	0.612241	Cytoplasm	0.640965	nucleus	0.889345
ENSG00000179523	EIF3J-AS1	ENST00000313807	Cytoplasm	0.840804	Cytoplasm	0.592168	Ribosome	0.847522
ENSG00000180769	WDFY3-AS2	ENST00000451762	nucleus	0.768119	Cytoplasm	0.760543	Cytoplasm	0.915343
ENSG00000259877	AC009113.1	ENST00000570267	Cytoplasm	0.820926	Cytoplasm	0.678802	Cytoplasm	0.782923
ENSG00000255248	MIR100HG	ENST00000636654	nucleus	0.71054	Cytoplasm	0.873289	Cytoplasm	0.969033
		ENST00000528986	nucleus	0.788892	Cytoplasm	0.832736	Cytoplasm	0.981919
ENSG00000236859	NIFK-AS1	ENST00000447668	Cytoplasm	0.836093	Exosome	0.738699	Cytoplasm	0.974617
ENSG00000225733	FGD5-AS1	ENST00000424349	Cytoplasm	0.858016	Cytoplasm	0.951711	Cytoplasm	0.973569
ENSG00000246528	AC079089.1	ENST00000528800	Cytoplasm	0.819129	Cytoplasm	0.726546	Cytoplasm	0.993372
